# Supplementary material for: T-cell Activation Is Correlated With Monocyte Activation in HCV/HIV Coinfection and Declines During HCV Direct-Acting Antiviral Therapy
Source: PubMed Central journal article supplement — Open Forum Infect Dis. 2021 Feb 18;8(4):ofab079. doi: 10.1093/ofid/ofab079 (PMC8043262; doi:10.1093/ofid/ofab079), 2021-02-18
Supplement: ofab079_suppl_supplementary_tables.pdf [file ofab079_suppl_supplementary_tables.pdf]

### Supplemental Table 1

Fluorochrome conjugated antibodies used for flow cytometric analysis.

| Stain         | Colour     | Clone  | Isotype | Company                  |
|---------------|------------|--------|---------|--------------------------|
| Viability dye | Aqua/BV510 |        | N/A     | Thermo Fisher Scientific |
| CD3           | PerCP      | UCHT1  | N/A     | Biolegend                |
| CD4           | Pac Blue   | RPA-T4 | N/A     | Biolegend                |
| CD8           | APC-Cy7    | SK1    | N/A     | Biolegend                |
| CD45RA        | PE Cy7     | HI100  | N/A     | Biolegend                |
| CD27          | AF700      | M-T271 | N/A     | Biolegend                |
| CD14          | BUV805     | M5E2   | N/A     | BD Biosciences           |
| CD16          | BV786      | 3G8    | N/A     | Biolegend                |
| CD31          | BUV 395    | WM59   | IgG1, k | BD Biosciences           |
| CD95          | APC        | DX2    | IgG1, k | BD Biosciences           |
| CD28          | BV711      | CD28.2 | IgG1, k | Biolegend                |
| CD38          | PE         | HIT2   | IgG1, k | BD Biosciences           |
| CD127         | BV605      | A019D5 | IgG1, k | Biolegend                |
| HLA-DR        | PE-CF594   | G46-6  | IgG1, k | BD Biosciences           |

## Supplemental Table 2

### Characteristics of secondary cohort participants

|                                       |                               |
|---------------------------------------|-------------------------------|
| <b>Sample size</b>                    | <b>n=15</b>                   |
| <b>DAA Regimen; * No. (%)</b>         |                               |
| Sofosbuvir/velpatasvir                | 4 (26.6%)                     |
| Ledipasvir/sofosbuvir                 | 10 (66.7%)                    |
| Elbasvir/grazoprevir                  | 1 (6.7%)                      |
| <b>HCV Genotype; * No. (%)</b>        |                               |
| 1a                                    | 6 (40%)                       |
| 1b                                    | 4 (27%)                       |
| 2                                     | 2 (13%)                       |
| 3                                     | 2 (13%)                       |
| 4                                     | 1 (7%)                        |
| <b>Plasma HCV RNA level (IU/L)</b>    | 1,360,000 (811,000-4,130,000) |
| <b>Serum Albumin level (g/dL)</b>     | 3.9 (3.7-4)                   |
| <b>Serum ALT level (IU/L)</b>         | 52 (27-87)                    |
| <b>Serum AST level (IU/L)</b>         | 42 (31-77)                    |
| <b>Platelets (K/ul)</b>               | 186 (162-232)                 |
| <b>APRI, AST/PLT index; * No. (%)</b> |                               |
| <0.4                                  | 11 (73%)                      |
| 0.4-1.5                               | 4 (27%)                       |
| >1.5                                  | 0 (0%)                        |
| <b>FIB-4 score</b>                    | 2 (01.2-2.7)                  |
| <b>CD4 cells/mm<sup>3</sup></b>       | 622 (529-1022)                |
| <b>Age, years</b>                     | 58 (48-61)                    |
| <b>Gender; * No. (%)</b>              |                               |
| Male                                  | 12 (80%)                      |
| Female                                | 2 (13%)                       |
| Transgender                           | 1 (7%)                        |
| <b>Race/ethnicity; * No. (%)</b>      |                               |
| Black                                 | 7 (47%)                       |
| White                                 | 5 (33%)                       |
| Hispanic                              | 3 (20%)                       |
| Hispanic                              | 16 (20%)                      |

Data are Median (25<sup>th</sup> , 75<sup>th</sup> percentiles), unless otherwise indicated \*
